# Supplementary material
Source: PubMed Central journal article supplement (PMC8992004)

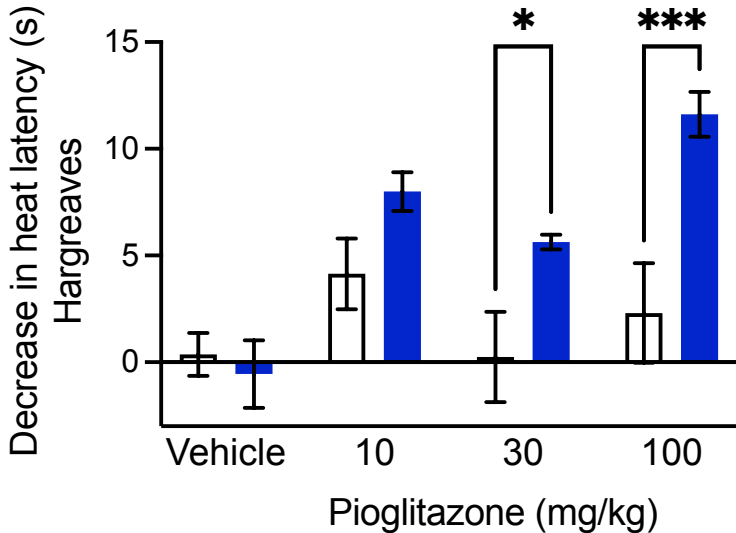

Supplement: NIHMS1763919-supplement-1.pdf [file NIHMS1763919-supplement-1.pdf]
